# Supplementary material for: Conformational Analysis of N-Alkyl-N-[2-(diphenylphosphoryl)ethyl]amides of Diphenylphosphorylacetic Acid: Dipole Moments, IR Spectroscopy, DFT Study
Source: MDPI journal article supplement (doi:10.3390/molecules26164832), 2021-08-10
Supplement: s1 [file s1]

## Supplementary material

### Conformational Analysis of *N*-Alkyl-*N*-[2-(diphenylphosphoryl)ethyl]amides of Diphenylphosphorylacetic acid: Dipole Moments, IR spectroscopy, DFT Study

Anastasia Kuznetsova <sup>1</sup>, Denis Chachkov <sup>2</sup>, Oleg Artyushin <sup>3</sup>, Natalia Bondarenko <sup>4,5</sup> and Yana Vereshchagina <sup>1,\*</sup>

<sup>1</sup> Department of Physical Chemistry, A.M. Butlerov Institute of Chemistry, Kazan Federal University, Kremlevskaya 18, 420008 Kazan, Russia; kuznetsovaanastan@gmail.com

<sup>2</sup> Kazan Department of Joint Supercomputer Center of Russian Academy of Sciences–Branch of Federal Scientific Center “Scientific Research Institute for System Analysis of the RAS”, Lobachevskogo 2/31, 420111 Kazan, Russia; de2005c@gmail.com

<sup>3</sup> A.N. Nesmeyanov Institute of Organoelement Compounds, Russian Academy of Sciences, Vavilova 28, 119991 Moscow, Russia; oleg.artushin@gmail.com

<sup>4</sup> <sup>a</sup>Institute of Chemical Reagents and High Purity Chemical Substances of National Research Centre “Kurchatov Institute”, Bogorodsky val 3, 107076 Moscow, Russia; Moscow, Russia; bond039@mail.ru

\* Correspondence: jveresch@kpfu.ru or yavereshchagina@yahoo.com

#### Contents

|                                                                                                                                                                                                                                                                                      |     |
|--------------------------------------------------------------------------------------------------------------------------------------------------------------------------------------------------------------------------------------------------------------------------------------|-----|
| Figure S1. Visualization of the molecular orbital HOMO-29 ( $E = -10.617$ eV) for 1c (the interaction between the P=O bond and phenyl substituents is absent). The positive and negative wave functions are shown as blue and red areas, respectively. Isocontour value is 0.02 a.u. | pS2 |
| Figure S2. IR spectra of compound <b>2</b> in different aggregate states. D is the absorbance.                                                                                                                                                                                       | pS3 |
| Figure S3. IR spectra of compound <b>3</b> in different aggregate states. D is the absorbance.                                                                                                                                                                                       | pS4 |
| Equations for $\alpha$ and $\gamma$ calculations (Guggenheim-Smith equation)                                                                                                                                                                                                         | pS5 |
| Figure S4. The $\varepsilon_i-w_i$ and $n_i^2-w_i$ plots for compound <b>1</b> .                                                                                                                                                                                                     | pS6 |
| Figure S5. The $\varepsilon_i-w_i$ and $n_i^2-w_i$ plots for compound <b>2</b> .                                                                                                                                                                                                     | pS7 |
| Figure S6. The $\varepsilon_i-w_i$ and $n_i^2-w_i$ plots for compound <b>3</b> .                                                                                                                                                                                                     | pS8 |

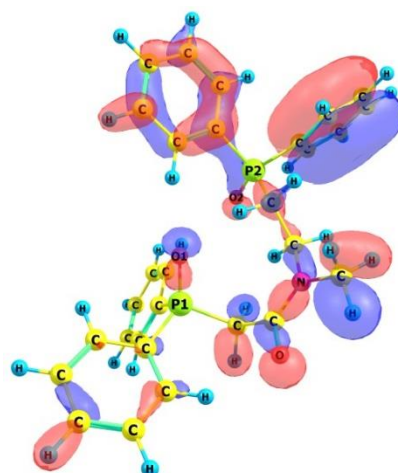

**Figure S1.** Visualization of the molecular orbital HOMO-29 ( $E = -10.617$  eV) for **1c** (the interaction between the  $\text{P}=\text{O}$  bond and phenyl substituents is absent). The positive and negative wave functions are shown as blue and red areas, respectively. Isocontour value is 0.02 a.u.

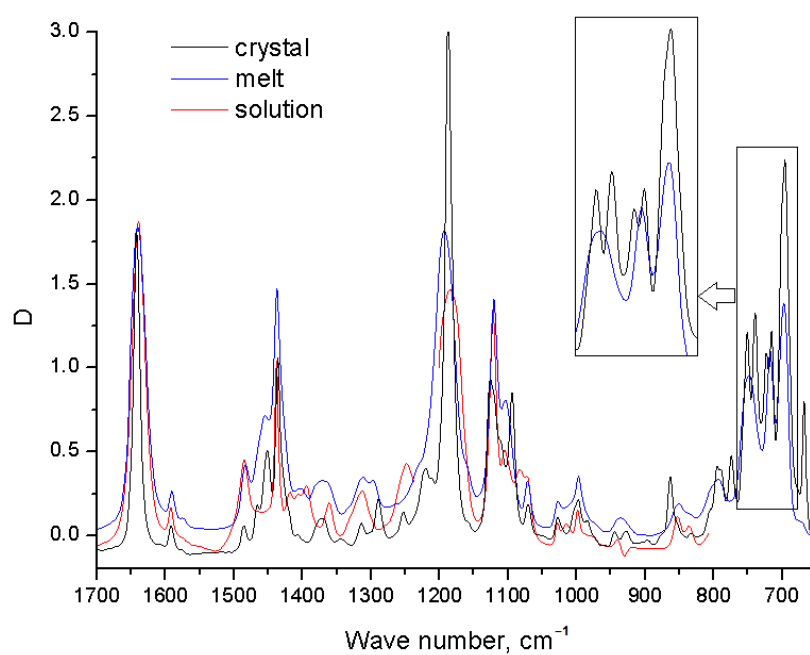

**Figure S2.** IR spectra of compound 2 in different aggregate states. D is the absorbance.

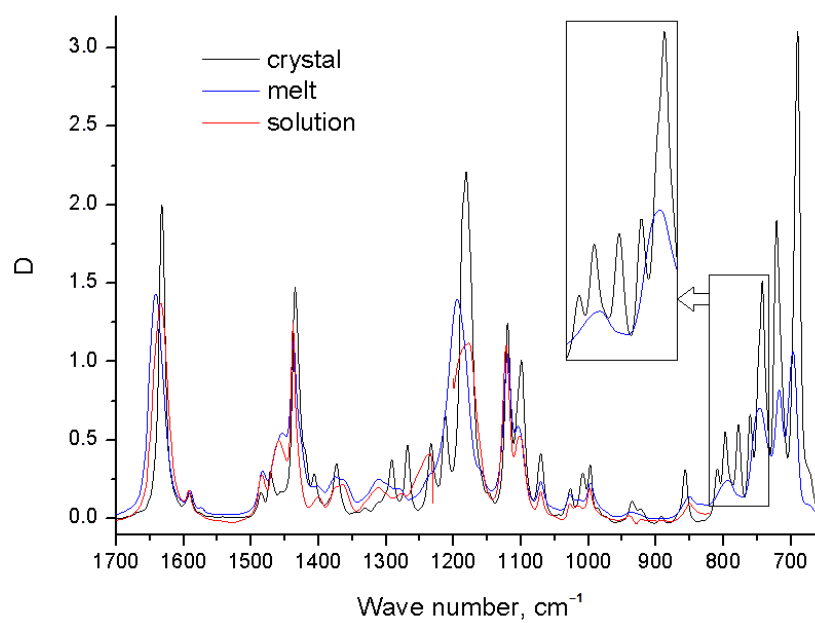

**Figure S3.** IR spectra of compound **3** in different aggregate states. D is the absorbance.

Equations for  $\alpha$  and  $\gamma$  calculations (Guggenheim-Smith equation):

$$\alpha = \frac{\varepsilon_i - \varepsilon_0}{\omega_i}$$

$$\gamma = \frac{n_i^2 - n_0^2}{\omega_i}$$

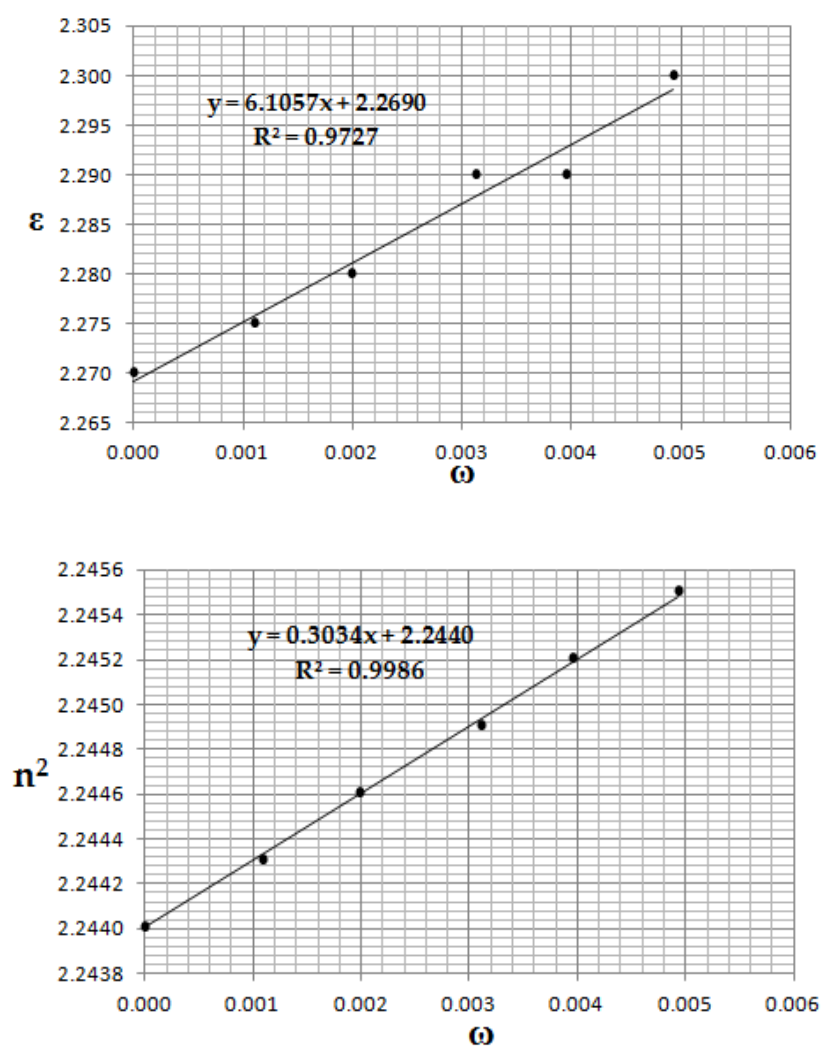

Figure S4. The  $\epsilon$ - $\omega$  and  $n^2$ - $\omega$  plots for compound 1.

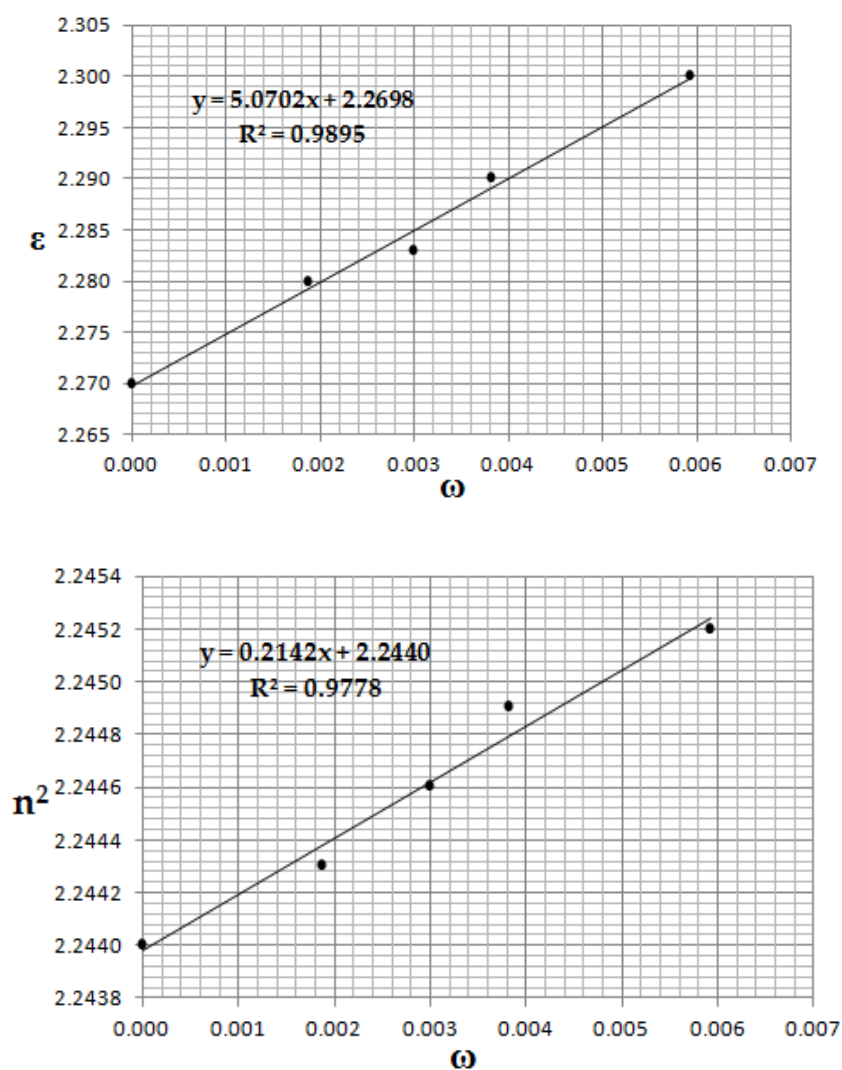

Figure S5. The  $\epsilon$ - $w_i$  and  $n^2$ - $w_i$  plots for compound 2.

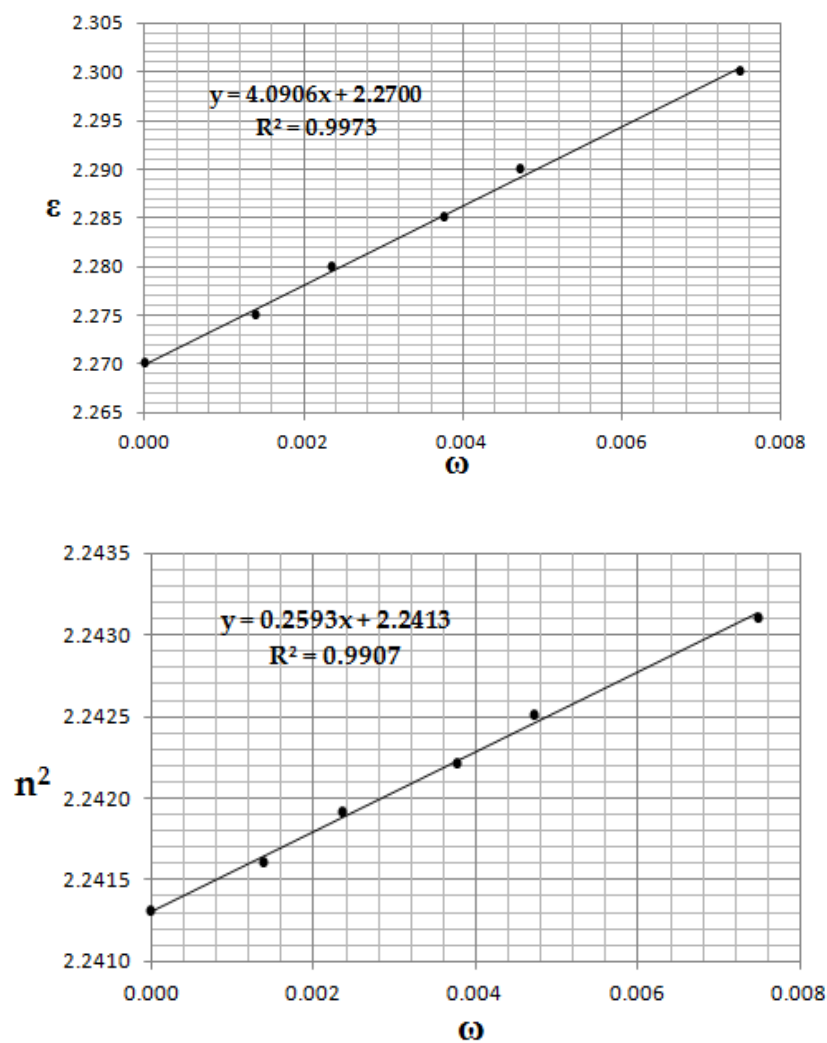

Figure S6. The  $\epsilon$ - $\omega$  and  $n^2$ - $\omega$  plots for compound 3.
